# Supplementary material for: High Glucose Exacerbates TNF-α-Induced Proliferative Inhibition in Human Periodontal Ligament Stem Cells through Upregulation and Activation of TNF Receptor 1
Source: Hindawi journal article supplement (doi:10.1155/2020/4910767), 2020-02-05
Supplement: f1 [file 4910767.f1.pdf]

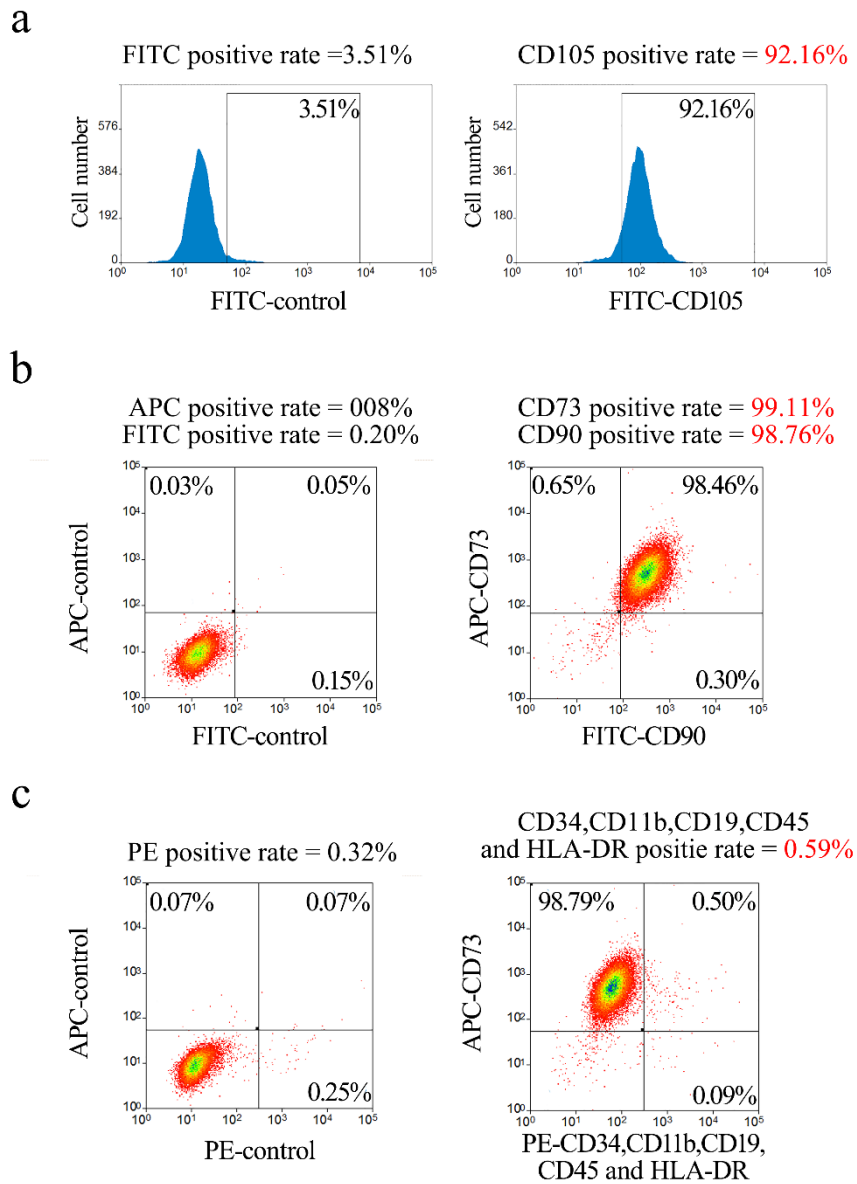

**Figure S1. Flow cytometry analysis of MSC surface markers in CD146+PDLCs**

Second passages of CD146+PDLCs after isolation by immunomagnetic beads were detected for MSC markers expression, including (a) CD105, (b) CD90, CD73, and (c) CD34, CD11b, CD19, CD45, HLA-DR.

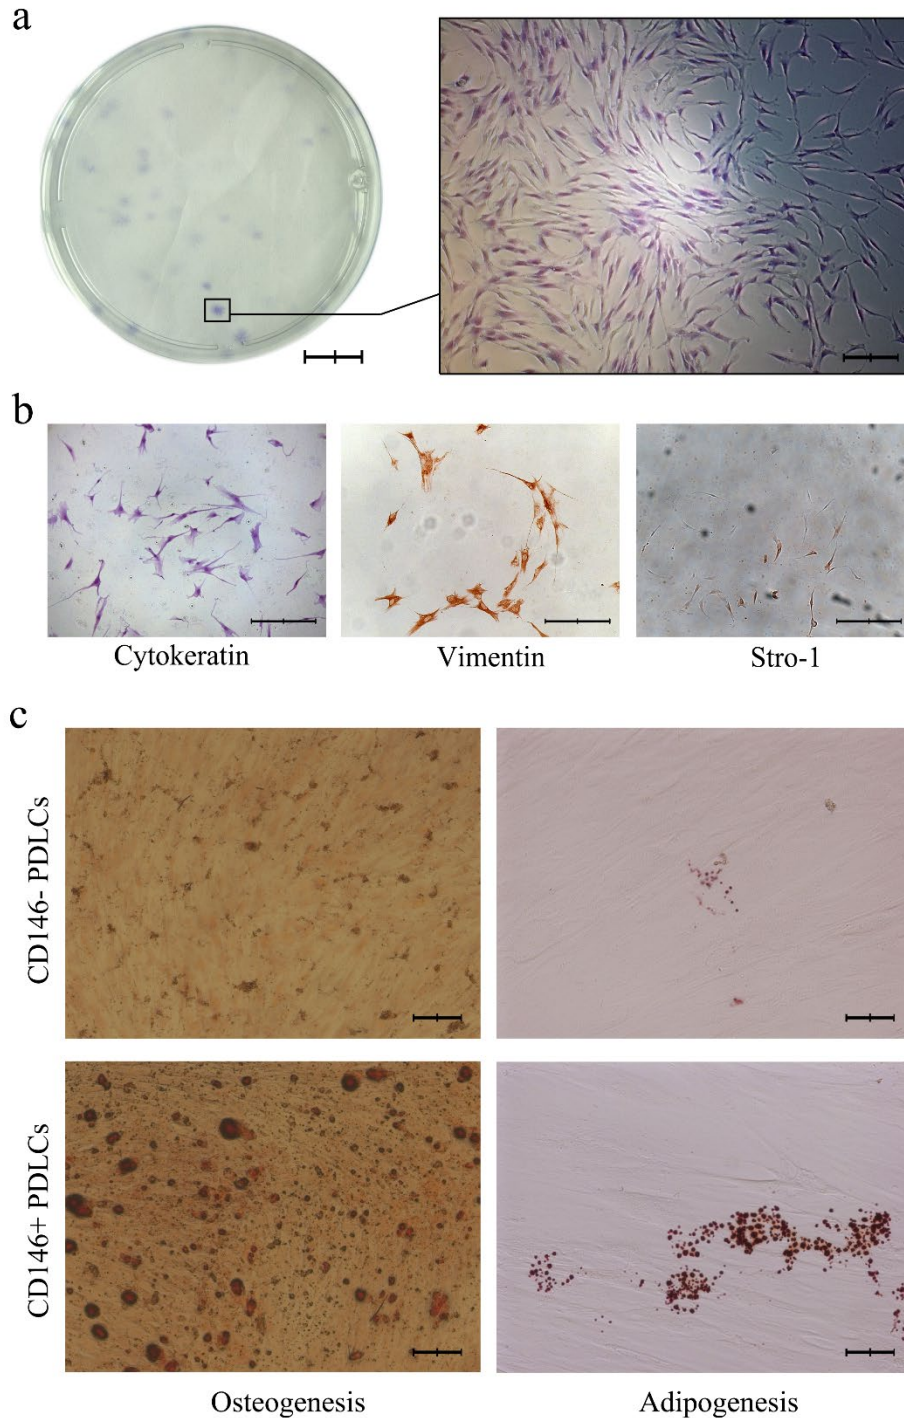

**Figure S2. CD146 positive periodontal ligament cells exhibit characteristics of mesenchymal stem cells**

(a) Colony-forming assay of CD146+PDLCs. CD146+PDLCs were seeded on culture dish (150 cells per dish) and cultured for another 14 days. Toluidine blue staining was performed to detect colonies. (Left) gross appearance; (Right) cell morphology under a microscope (100X, scale bar represents 200  $\mu$ m).

(b) Immunohistochemical staining for cytokeratin, vimentin, and Stro-1 of CD146+PDLCs. (Left) negative staining for cytokeratin (hematoxylin staining); (Middle) positive staining for vimentin; (Right) some cells were positive for Stro-1, whereas other cells were negative for Stro-1. Scale bar represents 200  $\mu$ m.

200 $\mu$ m.

(c) Osteogenic and adipogenic induction of both CD146-PDLCs and CD146+PDLCs. PDLCs were cultured under osteogenic or adipogenic conditions for 21 or 14 days; (Left) mineralized nodules were detected under osteogenic conditions using alizarin red staining; (Right) lipid clusters were stained with oil red O; Scale bars in pictures represent 200  $\mu$ m.

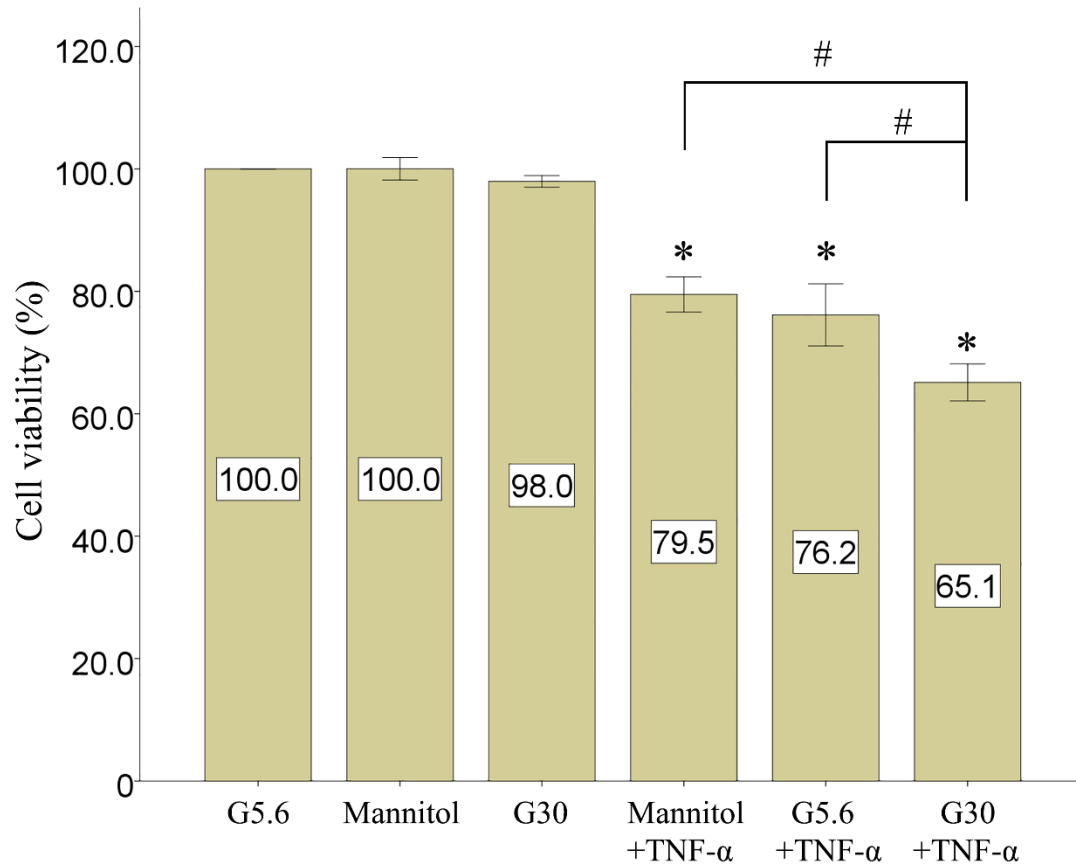

**Fig S3. Influence of osmotic pressure on cell viability of PDLSCs (day 6) .**

PDLSCs were cultured under different conditions (G5.6, G30, Mannitol, Mannitol+TNF- $\alpha$ , G5.6+TNF- $\alpha$ , and G30+TNF- $\alpha$ ). For the mannitol treatment group, cells were incubated in medium containing 5.6mM D-glucose and 24.4mM mannitol. Cell viability was detected by CCK-8 assay on day 6. Data are expressed as means  $\pm$  standard deviations. This assay was replicated 3 times using PDLSCs obtained from 3 different individuals. \*P<0.05 versus the control group (G5.6), #p<0.05 versus G30+TNF- $\alpha$  group.

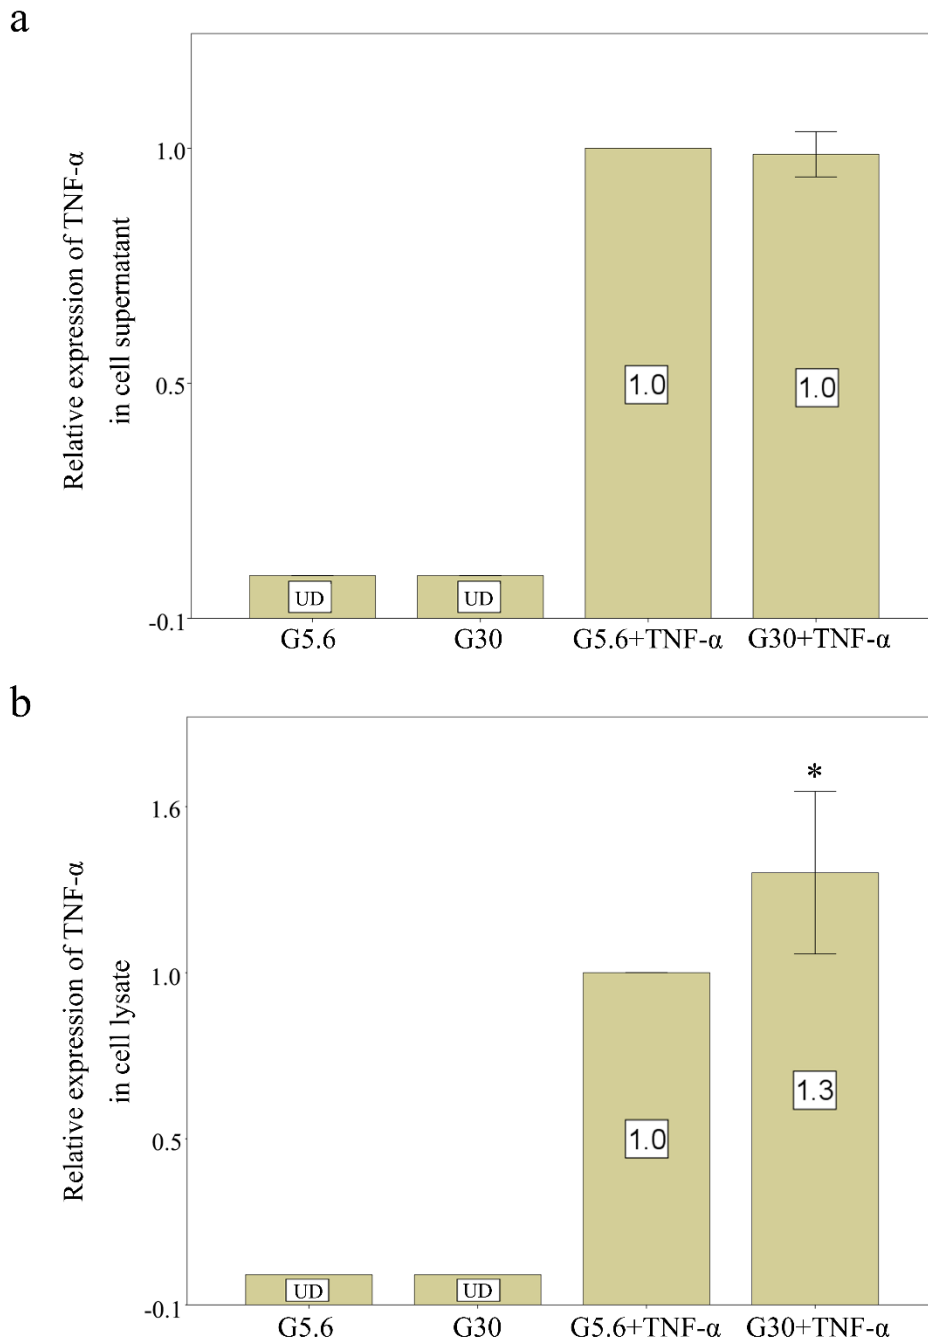

**Figure S4. Detection of TNF- $\alpha$  in cell supernatant and cell lysate after treatment with high glucose and TNF- $\alpha$  on day 2**

PDLSCs were treated under different conditions (G5.6, G30, G5.6+TNF- $\alpha$ , and G30+TNF- $\alpha$ ) for 48h, and ELISA was performed to detect the content of TNF- $\alpha$  (a) in the cell supernatant and (b) in the cell lysate; The value of G5.6+TNF- $\alpha$  group was regarded as 1.0; UD denotes undetected (below the threshold value 5.6 pg/ml of the ELISA kit); \* $p < 0.01$  versus G5.6+TNF- $\alpha$  group

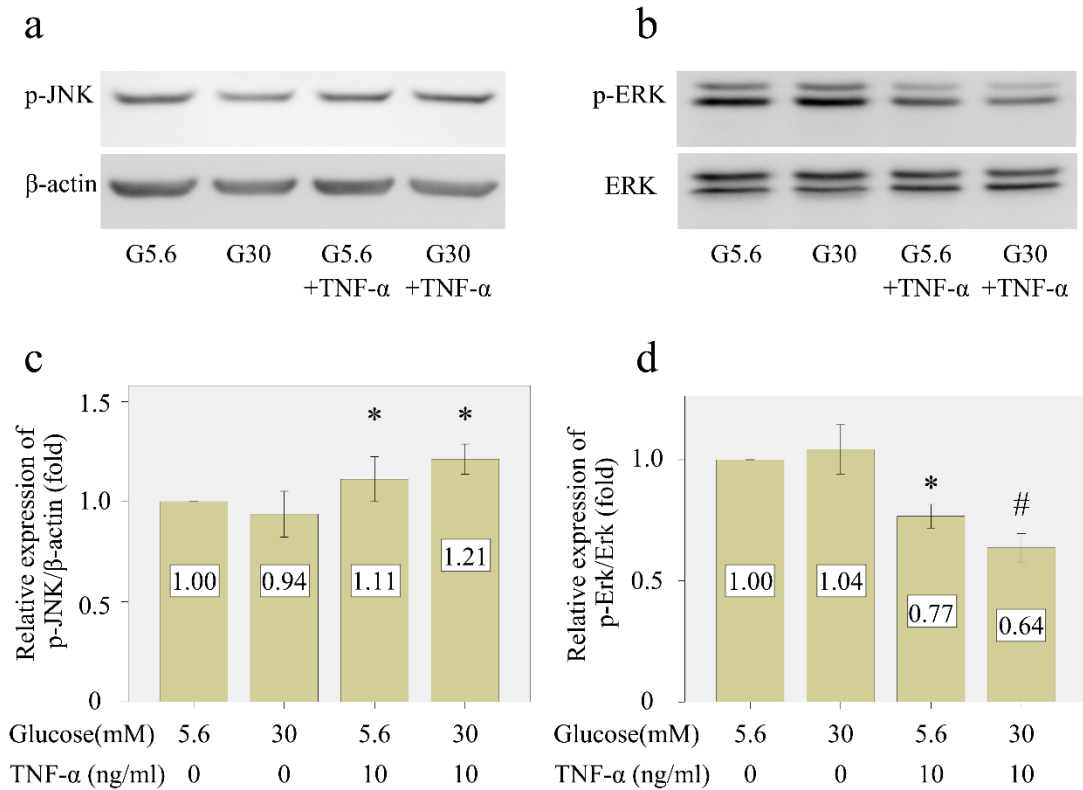

**Figure S5. Protein expression of p-JNK and p-ERK1/2 in PDLSCs under high glucose and TNF- $\alpha$  conditions (on day 6)**

PDLSCs were cultured under normal glucose or high glucose conditions in the presence or absence of TNF- $\alpha$ . Protein expression of phosphorylated JNK and phosphorylated ERK1/2 were detected by western blotting.

(a and c) Protein expression of p-JNK was elevated by TNF- $\alpha$  treatment on day 6. Data are expressed as means  $\pm$  standard deviations. All assays were replicated 3 times using PDLSCs obtained from 3 different individuals. \* $p < 0.05$  versus the control group.

(b and d) Protein expression of p-ERK1/2 was depressed by TNF- $\alpha$  treatment on day 6, which was further inhibited under high glucose conditions. Data are expressed as means  $\pm$  standard deviations. All assays were replicated 3 times using PDLSCs obtained from 3 different individuals. \* $p < 0.05$  versus the control group. # $p < 0.05$  versus G5.6+TNF- $\alpha$  group.

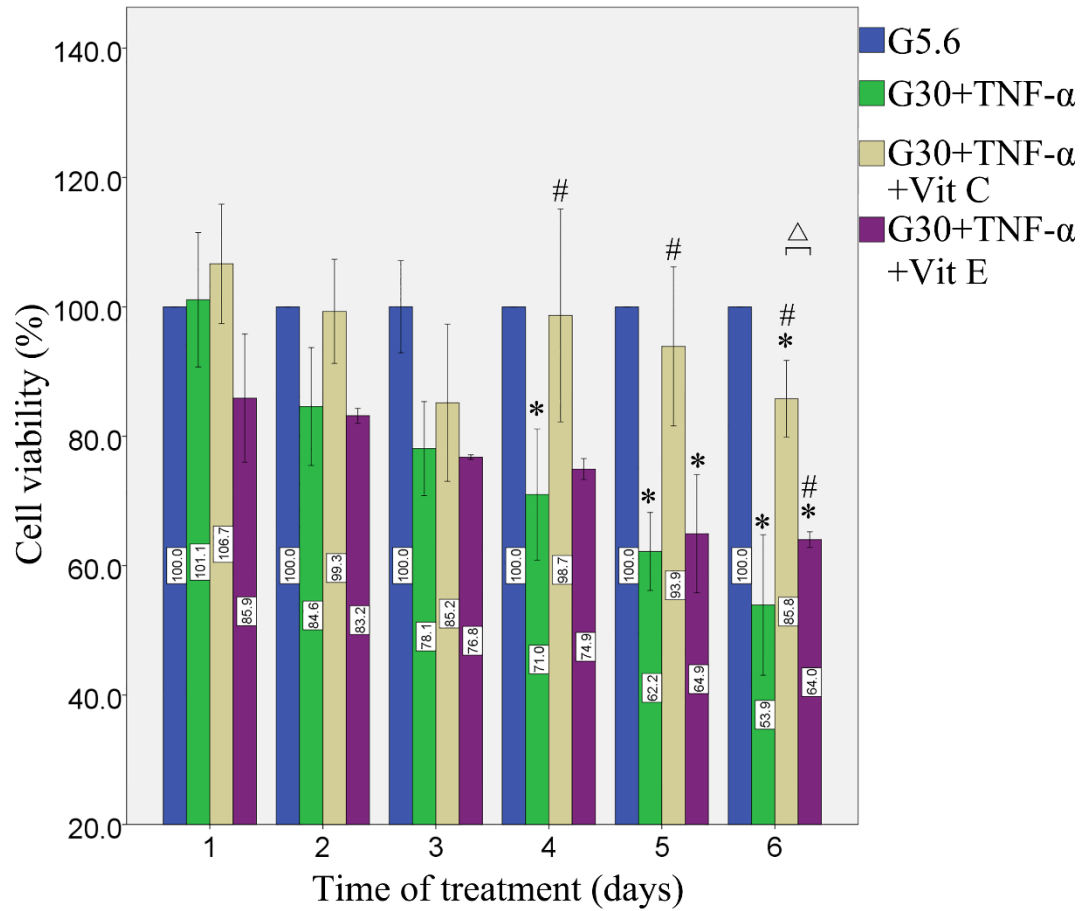

**Fig S6. Vitamin C and vitamin E partially reversed the proliferative inhibition induced by high glucose and TNF- $\alpha$ .**

PDLSCs were treated under different conditions (G5.6, G30, G5.6+TNF- $\alpha$ , G30+TNF- $\alpha$ ). Vitamin C (200 $\mu$ M) and vitamin E (200 $\mu$ M) was added into culture medium 1 hour before high glucose and TNF- $\alpha$  treatment. Cell proliferation was detected by CCK-8 assay every 24 hours. Data are expressed as means  $\pm$  standard deviations. All assays were replicated 3 times using PDLSCs obtained from 3 different individuals. \*P<0.05 versus the control group (G5.6), #p<0.05 versus G30+TNF- $\alpha$  group.  $\Delta$  represent the difference between the G30+TNF- $\alpha$ +Vit C group and the G30+TNF- $\alpha$ +Vit E group is statistically significant (p<0.05).

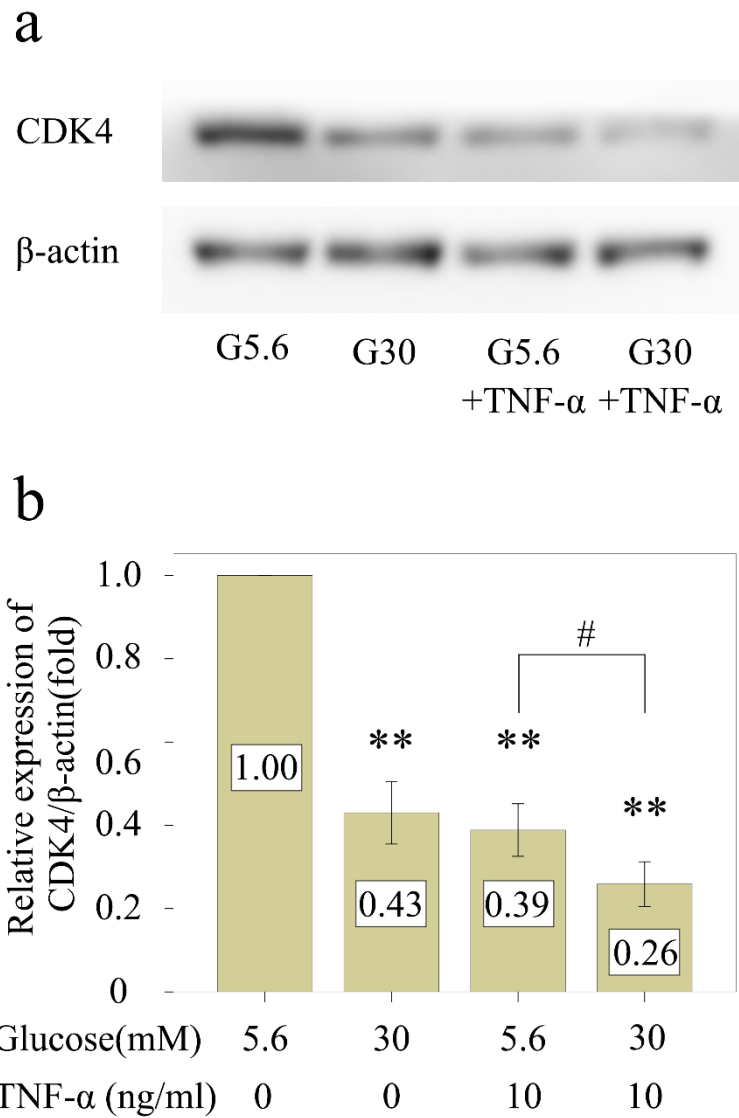

**Figure S7. Protein expression of CDK4 in PDLSCs under high glucose and TNF- $\alpha$  conditions (on day 6)**

PDLSCs were cultured under normal glucose or high glucose conditions in the presence or absence of TNF- $\alpha$ . Protein expression of CDK4 and  $\beta$ -actin were detected by western blotting. Data are expressed as means  $\pm$  standard deviations. The assay was replicated 3 times using PDLSCs obtained from 3 different individuals. \*\* $p < 0.01$  versus the control group. # $p < 0.05$  versus G5.6+TNF- $\alpha$  group.
